# Supplementary material
Source: PubMed Central journal article supplement (PMC4537828)
Supplement: NIHMS707493-supplement-1.pdf [file NIHMS707493-supplement-1.pdf]

**Table S1**

| name            | sequences (5'->3')    |
|-----------------|-----------------------|
| Mouse ISY1_1    | UCAUGAAGGCCAUCGAUUU   |
| Mouse ISY1_2    | GAAAGAAGUCCCAGGAAAUU  |
| Mouse SF3B1     | UCGGAAAGUCAGAGACGUUUU |
| Mouse CPSF2_1   | AGCUAAAAGAUGCCGAGUUA  |
| Mouse CPSF2_2   | GAAUUAAAUGGGACGAGUA   |
| Mouse CPSF3_1   | GUACCAGACCUACGUGAAU   |
| Mouse CPSF3_2   | UGAGAAGCGUGAAGAGCGA   |
| Mouse PRPF4_1   | CCAAAGCGCCUGACGAUUU   |
| Mouse PRPF4_2   | GAUUGUGGAUUGCUGAAUUA  |
| Mouse SNRNP40_1 | GUGAUAACUAUGCGACGUU   |
| Mouse SNRNP40_2 | AGGCUCAGACUGCGGAAUU   |
| Mouse U2AF2_1   | CUGCUUGUCCAGAGGGCGA   |
| Mouse U2AF2_2   | GGUUAAGGAUAGUGCCACA   |
| Mouse CSTF2_1   | GACUGUAACUGGAGACGUA   |
| Mouse CSTF2_2   | ACAAAUAUCCCAACGCUGA   |
| Mouse CSTF2T_1  | GCGAAACCUCAAUGGGCGA   |
| Mouse CSTF2T_2  | GACCUAACGUCAUGUUGAA   |
| Mouse FIP1L1_1  | CAAACAAGAUUACGGUACA   |
| Mouse FIP1L1_2  | ACAGUGACGAAGAGCGAUA   |

**List of siRNAs used (Related to Experimental Procedures)****Table S2**

| name                            | sequences (5'->3')              |
|---------------------------------|---------------------------------|
| Mouse ISY1_CDS_Sall_F           | GGTCGACATGGCCCGAAATGCAGAA       |
| Mouse ISY1_CDS_BamHI_R          | CGGATCCCTAGTACCCAGGAGTCGCTT     |
| Mouse CPSF3_CDS_Sall_F          | GGTCGACATGTCTGCGATTCTGCTGAGGA   |
| Mouse CPSF3_CDS_BamHI_R         | CGGATCCTCAGTGAAGTGGCGTCAGGGCC   |
| Mouse CPSF3_CDS_Not1_R          | GCGGCCGCTCAGTGAAGTGGCGTCAGGGCC  |
| Mouse pri_miR-17~92_EcoR1_F     | CGGAATTCCTAGTCATACACGTGGACCTA   |
| Mouse pro-pri_miR-17~92_EcoR1_F | CGGAATTCGTCAGAATAATGTCAAAGTGCT  |
| Mouse pri_miR-17~92_Xho1_R      | CGCTCGAGTCAGTGCTACAAAATAACTTT   |
| Mouse pro-pri_miR-17~92_Xho1_R  | CGCTCGAGCCAAACTCAACAGGCCGGGACAA |
| Mouse pri_miR-17~92_Xho1_F      | CGCTCGAGCCTAGTCATACACGTGGACCTA  |
| Mouse pre_miR-17_3P_Not1_R      | TGCGGCCGCCAGTAGATGCACACATCACT   |
| Muta_miR-17~92_AG_CC_F          | GTGACCAGTCccAATAATGTCAAAGTG     |
| Muta_miR-17~92_AG_CC_R          | AGCTTCAGTCCCAAGGTG              |
| Muta_miR-17~92_G_C_F            | GTGACCAGTCAcAATAATGTCAAAG       |
| Muta_miR-17~92_G_C_R            | CAGCTTCAGTCCCAAGGTG             |
| Muta_miR-17~92_A_C_F            | GTGACCAGTCCcGAATAATGTCAAAG      |
| Muta_miR-17~92_A_C_R            | AGCTTCAGTCCCAAGGTG              |
| Muta_miR-17~92_C_A_F            | TGTGACCAGTAgAATAATGTCAAAG       |
| Muta_miR-17~92_C_A_R            | GCTTCAGTCCCAAGGTGAG             |

|                                |                                                                                                                                                                                                                  |
|--------------------------------|------------------------------------------------------------------------------------------------------------------------------------------------------------------------------------------------------------------|
| Muta_miR-17~92_CA_GG_F         | TGTGACCAGTggGAATAATGTCAAAGTGC                                                                                                                                                                                    |
| Muta_miR-17~92_CA_GG_R         | GCTTCAGTCCCAAGGTGAG                                                                                                                                                                                              |
| Del_miR-17~92_RD_F             | AATTATTTATTTCAAATTTAGCAGGAATAAAG                                                                                                                                                                                 |
| Del_miR-17~92_RD_R             | TCTGTCACAAACATCAATTAC                                                                                                                                                                                            |
| Del_miR-17~92_RD*_F            | CAGGTTGGGATTTGTGCG                                                                                                                                                                                               |
| Del_miR-17~92_RD*_R            | CCCTTACTTCTCTACAGAC                                                                                                                                                                                              |
| Sub_miR-17~92_RD_F             | aagagaAATTATTTATTTCAAATTTAGCAGGAATAAAG                                                                                                                                                                           |
| Sub_miR-17~92_RD_R             | cattccAAAAAGCCAAAGCTCTAAATTC                                                                                                                                                                                     |
| Sub_miR-17~92_RD*_F            | cattccGAAAATCAAACCCCTTTCTAC                                                                                                                                                                                      |
| Sub_miR-17~92_RD*_R            | aagagaACAGACTTTTACCACCAC                                                                                                                                                                                         |
| Muta_CPSF3_75DK_76HA_F         | TTTCCATTTGaaggcCTGTGGAGCCCTGC                                                                                                                                                                                    |
| Muta_CPSF3_75DK_76HA_R         | TGACTGATCAACAGAAGG                                                                                                                                                                                               |
| Mouse pri_miR-17~92_EcoR1_40F  | CGGAATTCTAAAGTGAACCTCACCTTGGGA                                                                                                                                                                                   |
| Mouse pri_miR-17~92_EcoR1_80F  | CGGAATTCTTTGTCTAATTATTTATTTCAAAT                                                                                                                                                                                 |
| Mouse pri_miR-17~92_EcoR1_120F | CGGAATTCTTTGTGACAGAATTTAGAGCTT                                                                                                                                                                                   |
| Mouse pri_miR-17~92_EcoR1_160F | CGGAATTCCTTCTGGCTATTGGCTCCTCCC                                                                                                                                                                                   |
| Mouse pri_miR-17~92_EcoR1_200F | CGGAATTCAAGGCTTACATGTGTCCAATT                                                                                                                                                                                    |
| Mouse pri_miR-17~92_EcoR1_300F | CGGAATTCTTTGTAGGACCCTTATTGTGT                                                                                                                                                                                    |
| Mouse pri_miR-17~92_EcoR1_400F | CGGAATTCTATCTGACAATGTGGAGGAC                                                                                                                                                                                     |
| Mouse pri_miR-17~92_EcoR1_500F | CGGAATTCTATTTCTAATTTGGGGTGATA                                                                                                                                                                                    |
| Mouse pri_miR-17~92_EcoR1_600F | CGGAATTCAATAAATACAGTTTGAACCTTTG                                                                                                                                                                                  |
| Mouse pri_miR-17~92_EcoR1_700F | CGGAATTCGTGAGTATATTCTAGTTTTGTAGCTA                                                                                                                                                                               |
| CRISP_pre_miR17_F              | CACCGAATAAAGTGAACCTCACCTT                                                                                                                                                                                        |
| CRISP_pre_miR17_R              | AAACAAGGTGAGGTTCACTTTATTC                                                                                                                                                                                        |
| CRISP_pre_miR17_AG_CC          | ACAGAATTTAGAGCTTTGGCTTTTTCTTTTTGTCTAA<br>TTATTTATTTCAAATTTAGCAGGAATAAAGTGAACCTC<br>ACCTTGGGACTGAAGCTGTGACCAGTCCCAATAATGT<br>CAAAGTGCTTACAGTGCAGGTAGTGATGTGTGCATCT<br>ACTGCAGTGAGGGCACTTGTAGCATTATGCTGACAGC<br>TG |

**List of primers used for cloning (Related to Experimental Procedures)**

**Table S3**

| name           | sequences (5'->3')       |
|----------------|--------------------------|
| miR-17/20_R    | CTACCTGCACTATAAGCACTTTA  |
| miR-18a_R      | CTATCTGCACTAGATGCACCTTA  |
| miR-19_R       | TCAGTTTTGCATAGATTTGCACA  |
| miR-92_R       | CAGGCCGGGACAAGTGCAATA    |
| miR-17~92_P1_F | GCTCGTGGTTCTTAGGTGA      |
| miR-17~92_P1_R | GCAGCAAGCCTGAACTCTA      |
| miR-17~92_P2_F | GGTGAGTATATTCTAGTTTTGTA  |
| miR-17~92_P2_R | TCGACAAGATTAATGATTATTGTT |

|                |                             |
|----------------|-----------------------------|
| miR-17~92_P3_F | CTCATCCAATCCAAGTCAAGCAA     |
| miR-17~92_P3_R | ACACCACGCAGGCTCTACATCGA     |
| miR-17~92_P4_F | TGGTTTGAAGAGTCAGTCCTAC      |
| miR-17~92_P4_R | AGCACGCACTTCCTGAATA         |
| RP2_1          | AGTGCTACAGAAGCTGTCACATCACAC |
| RP2_2          | CTGGAGTTCTACAGCTGGCAGTACTTT |
| RP2_3          | ACACCACGCAGGCTCTACATCGA     |
| RP1_1          | TGGCAGGCTTCCTATGTT          |
| RP1_2          | GCAGGCTTCCTATGTTGGA         |
| RP1_3          | CTTCTTACTAAATCCAGCGAGC      |
| Pre-miR-92_R   | GTGTAGAAAGGGGTTTGATTTTCC    |
| Pre-miR-19b_R  | AACCATAGACCAGTGCTCAATAAC    |

**List of probes used for Northern blot and 5' RACE primers (Related to Experimental Procedures)**

**Table S4**

| name             | sequences (5'->3')       |
|------------------|--------------------------|
| Mouse ISY1_F     | GTTACCTGGATGAAGATGATGG   |
| Mouse ISY1_R     | TGGTTGCCTTCCTCATCA       |
| Mouse SF3B1_F    | CAACTTCCAGTGCTCGTAAA     |
| Mouse SF3B1_R    | CATTATGTGACCTGGAGTCG     |
| Mouse CPSF2_F    | TGAAGGGAAAGAACTTGAGG     |
| Mouse CPSF2_R    | CTTTGTCTTGTGAGCCGAT      |
| Mouse CPSF3_F    | CAAGACAAGAAGACAGACACCT   |
| Mouse CPSF3_R    | GAGAGCAAAGACAGGAATGAG    |
| Mouse DGCR8_F    | TCGGAAGAAACCCAAGATGT     |
| Mouse DGCR8_R    | GCCACAGGGAAGGAACTTAG     |
| Mouse Drosha_F   | CCCGACCTATGTAGAGAATCAGAT |
| Mouse Drosha_R   | TTGGAGTGGGTGGAGAGGAT     |
| Mouse U2AF2_P1F  | TGTTTATGTGCCTGGAGTTG     |
| Mouse U2AF2_P1R  | GGTGTCTGATTGATGGTGCT     |
| Mouse U2AF2_P2F  | TTCCCAAACAGCCTCTTATC     |
| Mouse U2AF2_P2R  | GGAAGACTAAGGAGAAGAACCA   |
| Mouse CSTF2_P1F  | TTCTATGCCAGGTGGAGTTC     |
| Mouse CSTF2_P1R  | GTCATTGGGAGCATCACCTA     |
| Mouse CSTF2_P2F  | TCCTGAGCAAAGACAGAGTATC   |
| Mouse CSTF2_P2R  | GAGCAATGGCGATGTAAGAC     |
| Mouse CSTF2F_P1F | TGTGAAGGACATTCCACCTC     |
| Mouse CSTF2F_P1R | GTCACTGAGAGCAAAGTCCC     |
| Mouse CSTF2F_P2F | TAGTTCCAGAGGTCCGATGA     |
| Mouse CSTF2F_P2R | CTTGTGGAGTTACCTGGCTT     |

|                                   |                          |
|-----------------------------------|--------------------------|
| Mouse FIP1L1_P1F                  | GCACCTCTTCTCAGTCTCAGA    |
| Mouse FIP1L1_P1R                  | GAGGAGGAAGGTGAGTAGGA     |
| Mouse FIP1L1_P2F                  | GGAAACAAGACACAAGTCCTC    |
| Mouse FIP1L1_P2R                  | GCATCTATTTCTGGGACTGAC    |
| Mouse PRPF4_P1F                   | TGGACCAGAAGGATGTCAAC     |
| Mouse PRPF4_P1R                   | GCAATGTCATACACACCCAT     |
| Mouse PRPF4_P2F                   | CGGAAGGACTCAGAACTTGT     |
| Mouse PRPF4_P2R                   | TGGCAGAACCTGAGATGAGA     |
| Mouse SNRNP40_P1F                 | GACTGTGATAACTATGCGACG    |
| Mouse SNRNP40_P1R                 | CTGGCTGGGTAACAGGAGTT     |
| Mouse SNRNP40_P2F                 | TCCCAAAGAGAGATGTGTGA     |
| Mouse SNRNP40_P2R                 | ACTGGATGCTGAGAGGATGA     |
| Mouse pri-miR-17~92_5'Upstram_F   | GGTGAGTATATTCTAGTTTTGTA  |
| Mouse pri-miR-17~92_5'Upstram_R   | TCGACAAGATTAATGATTATTGTT |
| Mouse pri-miR-17~92_CS_F          | AAGGCTTACATGTGTCCAATT    |
| Mouse pri-miR-17~92_CS_R          | CACTTAGGGCAGTAGATGCT     |
| Mouse pri-miR-17~92_3'Downstram_F | TGGTTTGAAGAGTCAGTCCTAC   |
| Mouse pri-miR-17~92_3'Downstram_R | AGCACGCACTTCCTGAATA      |

---

**List of primers used for q.RT-PCR (Related to Experimental Procedures)**
